# Supplementary material for: Efficient Reduction Photocatalyst of 4-Nitrophenol Based on Ag-Nanoparticles-Doped Porous ZnO Heterostructure
Source: MDPI journal article supplement (doi:10.3390/nano12162863), 2022-08-19
Supplement: s1 [file s1]

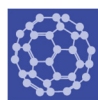

Article

# Efficient Reduction Photocatalyst of 4-Nitrophenol Based on Ag-Nanoparticles-Doped Porous ZnO Heterostructure

Shali Lin, Xiaohu Mi, Lei Xi, Jinping Li, Lei Yan, Zhengkun Fu \* and Hairong Zheng

School of Physics and Information Technology, Shaanxi Normal University, Xi'an 710119, China

\* Correspondence: zkfu@snnu.edu.cn

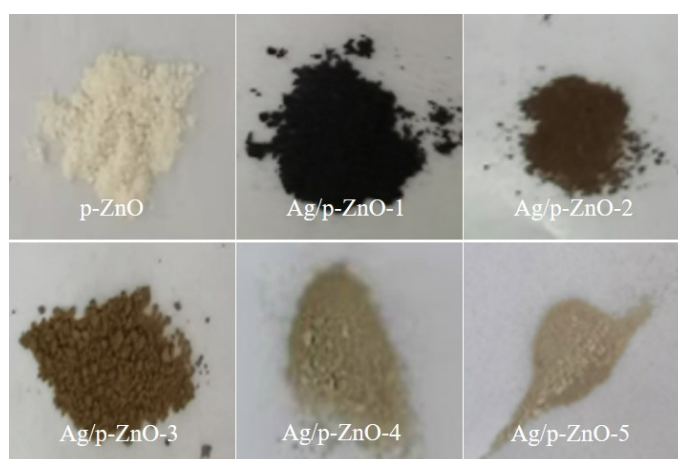

Figure S1. Digital photos of p-ZnO with different Ag NPs loading.

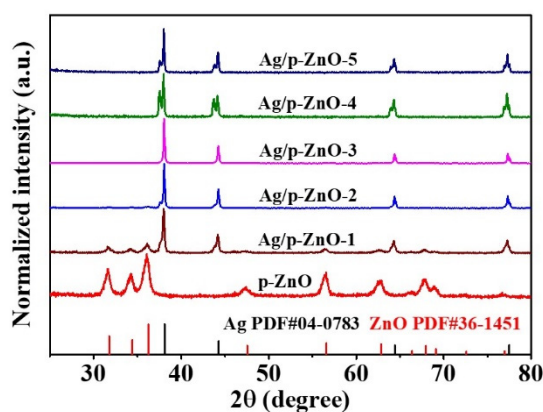

Figure S2. XRD patterns of Ag/p-ZnO with different Ag NPs loading.

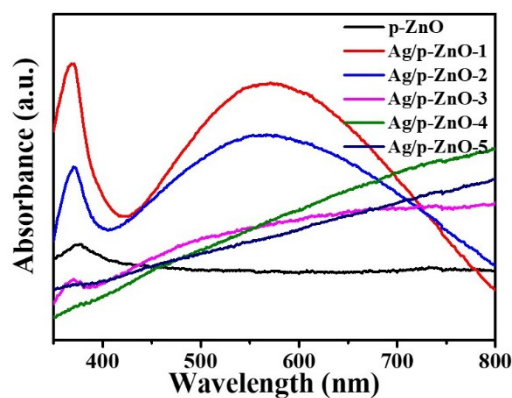

**Figure S3.** This is a figure. Schemes follow the same formatting. The UV-visible absorption spectra of Ag/p-ZnO with different Ag NPs loading.

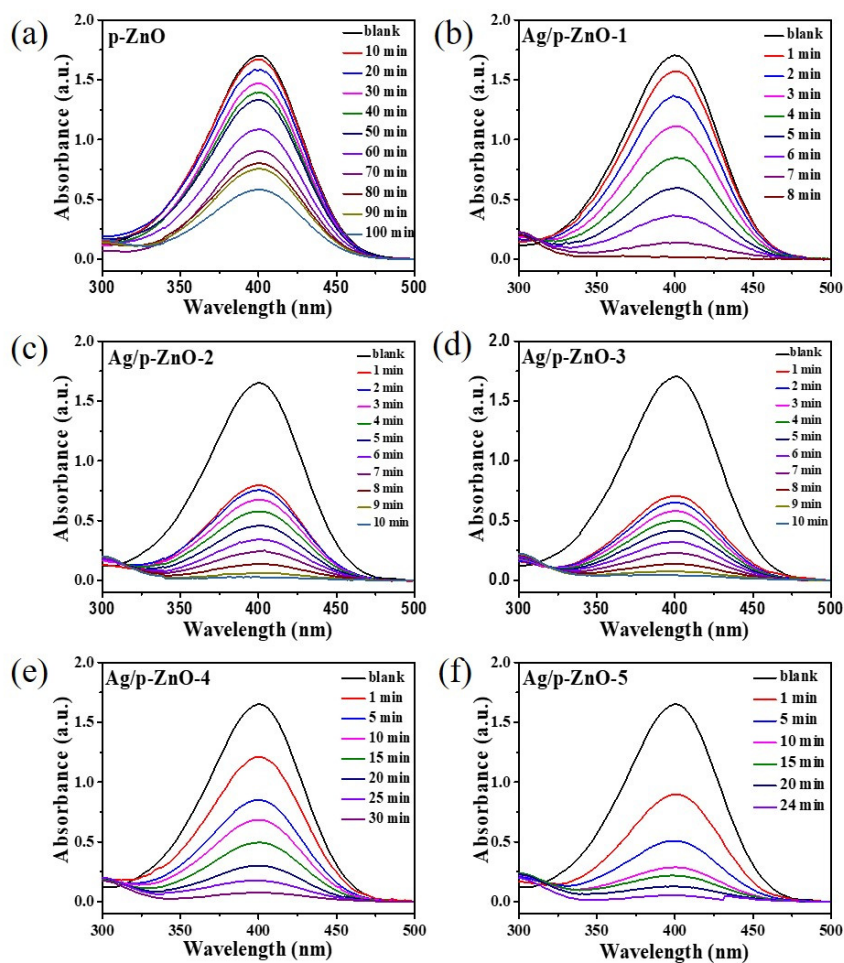

**Figure S4.** Time-dependent UV-vis spectra showing gradual reduction of 4-NP over Ag/p-ZnO collected at 1 min intervals continuously under natural light.

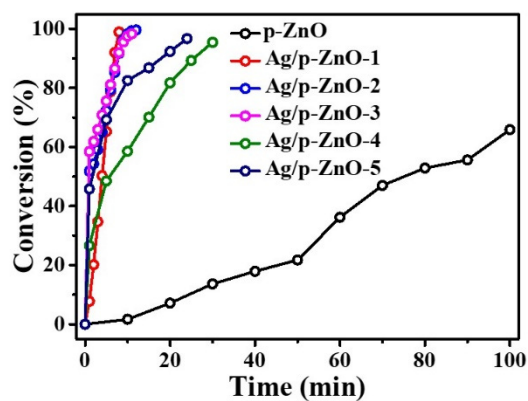

Figure S5. Catalytic conversion of 4-NP over Ag/p-ZnO heterostructure under natural light.

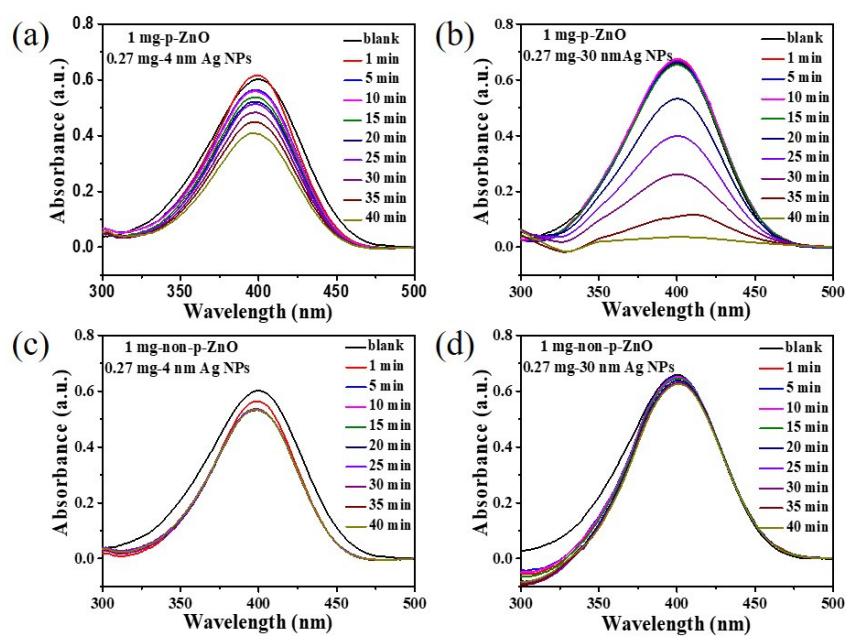

Figure S6. Comparative mixture catalysts collected at 1 min intervals continuously under natural light. (a) 1 mg-p-ZnO + 0.27 mg 4 nm Ag NPs, (b) 1 mg-p-ZnO + 0.27 mg 30 nm Ag NPs, (c) 1 mg-non-p-ZnO + 0.27 mg 4 nm Ag NPs, (d) 1 mg-non-p-ZnO + 0.27 mg 30 nm Ag NPs.

**Table S1.** Sample mass and concentration of reaction solution required for catalytic reaction.

| Catalyst Solution            | Ag/p-ZnO | p-ZnO<br>4 nm Ag NPs | p-ZnO<br>30 nm Ag NPs | non-p-ZnO<br>4 nm Ag NPs | non-p-ZnO<br>30 nm Ag NPs | p-ZnO    |
|------------------------------|----------|----------------------|-----------------------|--------------------------|---------------------------|----------|
| Ag/p-ZnO                     | 1 mg     | 0                    | 0                     | 0                        | 0                         | 0        |
| p-ZnO                        | 0        | 1 mg                 | 1 mg                  | 0                        | 0                         | 1 mg     |
| non-p-ZnO                    | 0        | 0                    | 0                     | 1 mg                     | 1 mg                      | 0        |
| 4 nm Ag NPs (0.27 mg/mL)     | 0        | 1 mL                 | 0                     | 1 mL                     | 0                         | 0        |
| 30 nm Ag NPs (0.27 mg/mL)    | 0        | 0                    | 1 mL                  | 0                        | 1 mL                      | 0        |
| 4-NP (0.4 mM/mL)             | 1 mL     | 1 mL                 | 1 mL                  | 1 mL                     | 1 mL                      | 1 mL     |
| NaBH <sub>4</sub> (40 mM/mL) | 1 mL     | 1 mL                 | 1 mL                  | 1 mL                     | 1 mL                      | 1 mL     |
| DI-water/mL                  | 0        | 2.705 mL             | 2.705 mL              | 2.705 mL                 | 2.705 mL                  | 2.705 mL |
| Toal volume/ mL              | 2 mL     | 5.705 mL             | 5.705 mL              | 5.705 mL                 | 5.705 mL                  | 5.705 mL |

**Table S2.** The rate constants  $k_{app}$  (min<sup>-1</sup>) and conversion rate calculated from Fig.5 and Fig.S5.

| Sample   | $k_{app}$ (min <sup>-1</sup> ) | Conversion (%) |
|----------|--------------------------------|----------------|
| p-ZnO    | 0.011 ± 0.001                  | 65.9 ± 0.0     |
| Ag/ZnO-1 | 0.482 ± 0.095                  | 99.0 ± 0.2     |
| Ag/ZnO-2 | 0.432 ± 0.041                  | 99.6 ± 0.0     |
| Ag/ZnO-3 | 0.334 ± 0.027                  | 98.4 ± 0.3     |
| Ag/ZnO-4 | 0.091 ± 0.007                  | 95.4 ± 0.0     |
| Ag/ZnO-5 | 0.122 ± 0.011                  | 96.8 ± 0.2     |
